# Supplementary material for: Acaricidal activity of Piper nigrum fruit extracts on the cattle tick, Rhipicephalus (Boophilus) australis (syn. R. microplus)
Source: Research Square preprint supplement (doi:10.21203/rs.3.rs-2341900/v1), 2022-12-09
Supplement: Supplementary file 1 [file 90681ed6150962a29ef8a8ae.xlsx]

## Sheet: Sheet1
	(1) PELLITORINE (m/z=223,1936 - C14H25NO)						(2) HOMOPELLITORINE (m/z=237,2092 - C15H27NO)						(3) PIPYAQUBINE (m/z : 333,3031 – C22H39NO)
	Position		1H / I / m / J (Hz)		13C		Position		1H / I / m / J (Hz)		13C		Position		1H / I / m / J (Hz)		13C
	1 (C=O)		-		166.33		1 (C=O)		-		166.42		1 (C=O)		-		165.9
	2		5.74 / 1H / d / 15.2		121.51		2		5.7 / 1H / d / 14.9		121.67		2		6.22 / 1H / d / 14.8		118.7
	3		7.17 / 1H / dd / 15 ; 10		141.26		3		7.15 / 1H / dd / 15.1 ; 10		141.35		3		7.19 / 1H / dd / 10.5 ; 4.3		142
	4		6.07 / 2H / m		128.06		4		6.1 / 1H / dd / 15.6 ; 9.5		128.17		4		6.15 / 1H / dd / 15.1 ; 10.8		129.01
	5				143.15		5		6.03 / 1H / dd / 15.3 ; 6.2		143.26		5		6.03 / 1H / m		143.1
	6		2.12 / 2H / q / 6.9		32.78		6		2.1 / 2H / dd / 13.2 ; 6.6		32.97		6		2.1 / 2H / q / 7.2		33.1
	7		1.39 / 2H / m		31.23		7		1.25 / 6H / m		29.08		7 - 16		1.2 - 1.31 / 20H / m		29 - 32
	8		1.28 / 4H / m		28.34		8				28.6		17		1.4 / 2H / m		22.8
	9				22.33		9				22.5		18		0.9 / 3H / t		14.31
	10		0.86 / 3H / t / 6.8		13.86		10		0.85 / 3H / m		14.08
													1'-4'		3.47 - 3.58 / 4H / m		43-47
	NH		5.59 / 1H / brs		-		NH		5.4 / 1H / brs		-		2'-3'		1.55 - 1.62 / 4H / m		24.8 - 26.8
	1'		3.14 / 2H / t / 6		46.84		1'		3.14 / 2H / t / 6.5		46.9
	2'		1.78 / 1H / m		28.49		2'		1.38 / 1 H / t / 6.7		31.75
	3'		0.9 / 6H / d / 6.8		19.99		3'		1.77 / 2H / sept. / 6.7		28.81
	4'						4'		0.9 / 6H / d / 6.6		20.13
							5'				20.13
	(4) N-isobutyl-2,4,12(E,E,Z)-octadecatrieamide (m/z=333,5512 - C22H39NO)						(5) N-isobutyl-2,4-eicosadienamide (m/z : 363,6202 – C24H45NO)
	Position		1H / I / m / J (Hz)		13C		Position		1H / I / m / J (Hz)		13C
	1 (C=O)		-		166.6		1 (C=O)		-		167 (HMBC)
	2		5.75 / 1H / d / 15.2		121.9		2		5.72 / 1H / d / 15		121
	3		7.18 / 1H / dd / 15.1 ; 10		141.4		3		7.17 / 1H / dd / 15.1 ; 9.9		141
	4		6.1 / 1H / dd / 14.9 ; 9.8		128.4		4		6.1 / 1H / dd / 15 ; 9.6		128
	5		6.02 / 1H / dd / 15.5 ; 6.4		143.3		5		6.03 / 1H / dd / 15.2 ; 6.4		143
	6		2.11 / 2H / q		33.15		6		2.12 / 1H / q		32.18
	7		1.38 / 2H / t / 6		29; 29.92; 29.52; 29.35		7		1.54 / 2H / t / 7.2		29
	8		1.22-1.31 / 12H / m				8-19		1.23 / 24H / s		29.3-29.9
	9						20		0.9 / 3H / d / 6.6		20.37
	10
	11		1.9 / 4H / m		27.11		NH		5.43 / 1H / brs		-
	12		5.32 / 2H / t / 5.6		130		1'		3.14 / 1H / t / 6.4		47.19
	13				130.1		2'		1.78 / 2 H / sept / 6.8		28.9
	14		1.9 / 4H / m		27.36		3'		0.86 / 6H / t / 6.8		14.37
	15		1.22-1.31 / 12H / m		28.87		4'
	16				32.17
	17				22.54
	18		0.86 / 3H / m		14.2
	NH		5.55 / 1H / brs		-
	1'		3.13 / 2H / t / 6.4		47.14
	2'		1.77 / 1 H / sept / 6.8		28.83
	3'		0.9 / 6H / d / 6.6		20.35
	4'
